# Supplementary material
Source: PubMed Central journal article supplement (PMC2562540)
Supplement: NIHMS60968-supplement-si20060213_074.pdf [file NIHMS60968-supplement-si20060213_074.pdf]

## Supporting Information

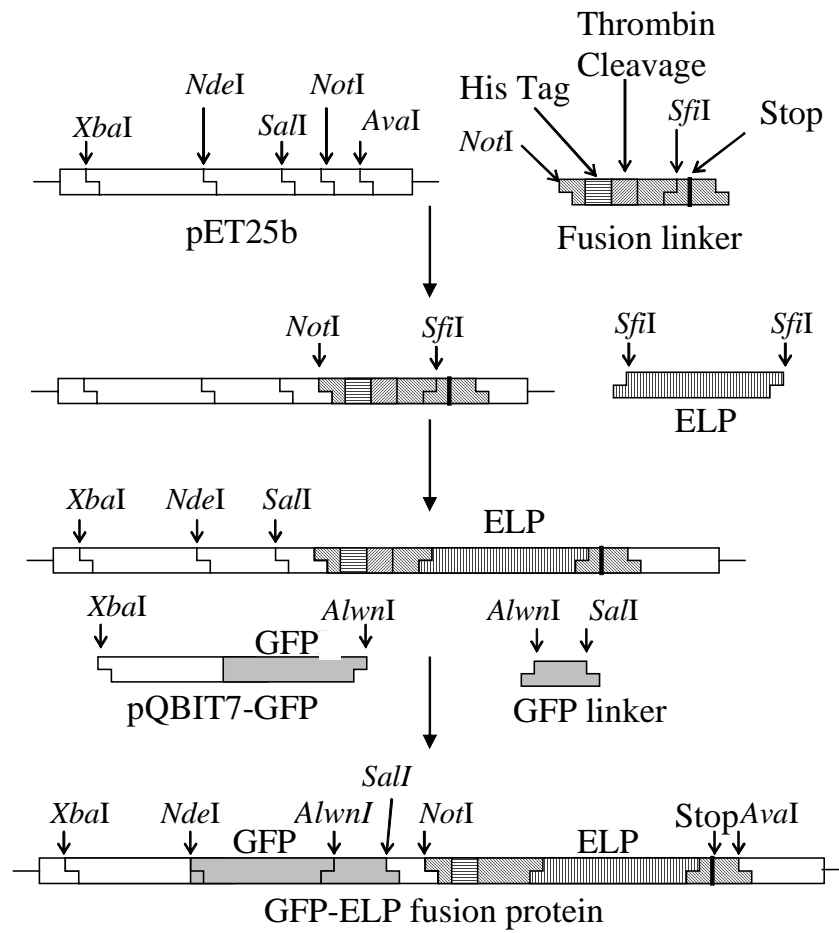

Figure S1. Detailed schematic of the construction of GFP-ELP fusion vector.

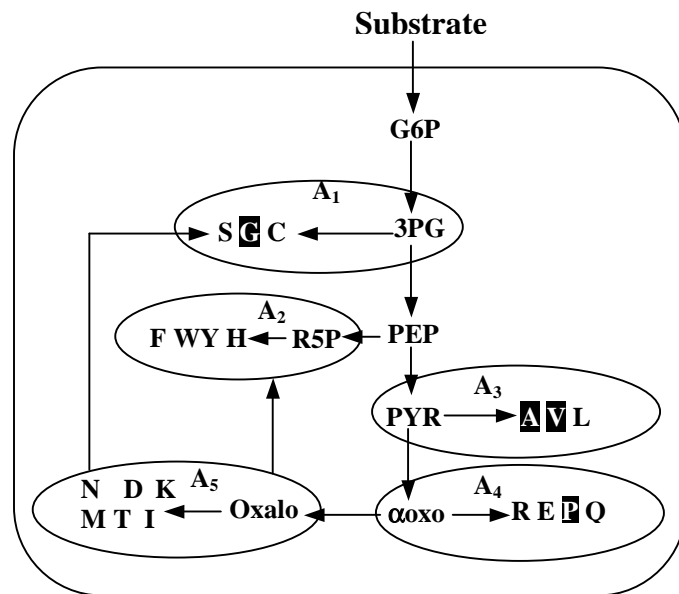

Figure S2. Amino acid metabolic pathways of a recombinant *E. coli* cell. Redrawn from (18). Amino acid family and precursors: A<sub>1</sub>: serine, A<sub>2</sub>: aromatic and histidine, A<sub>3</sub>: alanine, A<sub>4</sub>: glutamine, A<sub>5</sub>: aspartate. Other species are: G6P: glucose-6-phosphate, R5P: ribulose-5-phosphate, 3PG: 3-phosphoglycerate, PEP: phosphoenolpyruvate, PYR: pyruvate, αoxo: α-oxoglutarate, Oxalo: oxaloacetate, and individual amino acids are represented by their standard one letter code. Amino acids that are abundant in ELPs are highlighted.
